# Supplementary material
Source: publisher site journal article supplement (https://www.spandidos-publications.com/8145/downloadSupplementary)
Supplement: Supplementary file 1 [file downloadSupplementary]

Table S1. Gene lists for cluster markers.

| Markers                                       | Cluster    |
|-----------------------------------------------|------------|
| EpCAM, SFN, KRT14, KRT5, KRT18, KRT19         | Epithelial |
| FN1, DCN, COL1A1, COL1A2, COL3A1, COL6A1      | Fibroblast |
| CD2, CD3D, CD3E, CD3G                         | T cell     |
| CD19, CD79A, MS4A1, JCHAIN, MZB1              | B cell     |
| CD68, LYZ, CD14, IL3RA, LAMP3, CLEC4C, RPSAB1 | Myeloid    |

Table SII. Gene lists for M1/M2 macrophage biomarkers.

| Markers                                                                                  | Cluster             |
|------------------------------------------------------------------------------------------|---------------------|
| CCL2, CCL3, CCL5, CXCL10, CXCL11, CXCL16, CXCL8, CXCL9, iNOS, TNF- $\alpha$ , CD80, IL-6 | M1-like macrophages |
| TGF- $\beta$ , IL-10, CD206, CD163, CCL17, CCL18, CCL22, IL-1 $\beta$                    | M2-like macrophages |

Table SIII. Clinical and pathological parameters of patients with oral squamous cell carcinoma.

| Characteristic | Cases |
|----------------|-------|
| Sex            |       |
| Male           | 26    |
| Female         | 14    |
| Age            |       |
| ≤62            | 17    |
| ≥62            | 23    |
| Site of lesion |       |
| Palate         | 4     |
| Buccal mucosa  | 8     |
| Tongue         | 7     |
| Lip            | 9     |
| Gingival       | 6     |
| Mouth floor    | 1     |
| Pharynx        | 1     |
| Submandibular  | 2     |
| Mandible       | 2     |
| Grade          |       |
| I              | 24    |
| II             | 11    |
| III            | 5     |
